# Supplementary material for: Doppler-Guided Second-Look Endoscopy in Peptic Ulcer Bleeding: A Randomised Controlled Trial
Source: MDPI journal article supplement (doi:10.3390/jcm12216722), 2023-10-24
Supplement: s1 [file s1]

**Supplementary Table S1.** Forrest Classification

| Forrest Classification | Stigmata of bleeding at ulcer base |
|------------------------|------------------------------------|
| Ia                     | Spurting bleeding                  |
| Ib                     | Oozing bleeding                    |
| IIa                    | Non-bleeding visible vessel        |
| IIb                    | Adherent clot                      |
| IIc                    | Hematin on ulcer base              |
| III                    | Clean base ulcer                   |

Adapted from Forrest et al.[6]

**Supplementary Table S2.** Criteria for rebleeding \*.

|                                                                                                                                                                                                                                                                                                         |
|---------------------------------------------------------------------------------------------------------------------------------------------------------------------------------------------------------------------------------------------------------------------------------------------------------|
| Hematemesis or bloody nasogastric aspirate > 6 hours after endoscopy                                                                                                                                                                                                                                    |
| Melena after normalization of stool color                                                                                                                                                                                                                                                               |
| Hematochezia after normalization of stool color or after melena                                                                                                                                                                                                                                         |
| Development of tachycardia (heart rate $\geq 110$ beats per minute) or hypotension (systolic blood pressure $\leq 90$ mmHg) after at least one hour of hemodynamic stability in the absence of an alternative explanation for hemodynamic instability such as sepsis, cardiogenic shock, or medication. |
| Hemoglobin drop of $\geq 2$ g/dL after two consecutive stable hemoglobin values ( $< 0.5$ g/dL decrease) $\geq 3$ hours apart                                                                                                                                                                           |
| Tachycardia or hypotension that does not resolve within 8 hours after index endoscopy despite appropriate resuscitation (in the absence of an alternative explanation), associated with persistent melena or hematochezia                                                                               |
| Persistently dropping hemoglobin of $> 3$ g/dL in 24 hours associated with persistent melena or hematochezia                                                                                                                                                                                            |

\* Rebleeding was defined as fulfillment of one of these criteria. Adapted from Laine et al.[16]
